# Supplementary material for: Sociodemographic, Legal, and Clinical Profiles of Female Forensic Inpatients in Karnataka: A Retrospective Study
Source: PubMed Central journal article supplement — Indian J Psychol Med. 2019 Mar-Apr;41(2):138–43. doi: 10.4103/IJPSYM.IJPSYM_152_18 (PMC6436409; doi:10.4103/ijpsym.ijpsym_152_18), 2019
Supplement: IJPsyM-41-138_Suppl1.pdf [file IJPsyM-41-138_Suppl1.pdf]

**ONLINE-ONLY SUPPLEMENTAL MATERIAL**

**NATIONAL INSTITUTE OF MENTAL HEALTH AND NEURO SCIENCES, BANGALORE.  
FORENSIC PSYCHIATRY WORKUP PROFORMA**

Name.....

P/No.....

Date.....

Time.....

Place of Examination:

Accompanying Persons:

Information: Reliable/adequate

Name of the Patient with alias:

Sex:

Male/Female/Third gender

Age:

.....

Marital status:

.....

Education:

.....

Occupation:

.....

Father Name:

.....

Mother Name:

.....

Residential address with mobile number:

**Identification Marks:**

a)

b)

**Referring authority:**

1) Magistrate 2) Prison Superintendent 3) Medical officer 4) Others (specify)

-----

**Reason for referral:**

1) For certificate 2) Treatment 3) Fitness to stand trial 4) Fitness for job 5) Testamentary capacity 6) Any other

**Accompanying letters** (Referral letter details with date):

1)

2)

3)

4)

**Legal status:**

- 1) UTP No:
- 2) CTP No:
- 3) Reception Order No:
- 4) On Bail:
- 5) Disciplinary action (suspended/dismissed)
- 6) any others

**Duration of stay in prison /Police Station:**

**Charges against the patient / Information regarding the conflict with law** (if possible include IPC sections if patient is from prison):

**Behavioural Observation report from the referring authority:**

- a) Provided
- b) Not provided

(If present please summarize here)

**Chief complaints as per the referring authority or accompanying person:**

**Chief complaints as per the patient:**

**Circumstances around the incident or conflict with law or alleged crime:** (Please collect information one week prior and one week after the alleged crime or in conflict with law)

**History of Presenting Illness:** (Please specify the sources of information)

**Past history of Medical/psychiatric illness and Treatment history:** (Please specify the sources of information)

**Family history:** (Please do three generation pedigree charting with names of each family members, age, occupation and illness) Please do the pedigree charting as per the persons with mental illness provided information

**Personal history:** (Please collect information on substance use /high-risk behaviour)

**Premorbid personality:** (Ask the person to describe himself if no informant is available)

**Mental Status Examination and Cognitive Function:**

## Medical Examination

### General Physical Examination

|                  |          |                  |  |
|------------------|----------|------------------|--|
| Pulse            |          | Pallor           |  |
| Blood Pressure   | Supine   | Icterus          |  |
|                  | Standing | Cyanosis         |  |
| Temperature      |          | Clubbing         |  |
| Respiratory Rate |          | Lymphadenopathy  |  |
| Pupils           |          | Oedema           |  |
| Height           |          | Oral Examination |  |
| Weight           |          | Fundus           |  |
| Body Mass Index  |          |                  |  |

### Systemic Examination

|                        |  |              |  |
|------------------------|--|--------------|--|
| Cardio Vascular System |  |              |  |
| Heart Rate             |  | Heart Sounds |  |
| Murmurs                |  |              |  |

#### Other Positive Findings (If Any):

|                    |  |                     |  |
|--------------------|--|---------------------|--|
| Respiratory System |  |                     |  |
| Air Entry          |  | Adventitious Sounds |  |
| Breath Sounds      |  |                     |  |

#### Other Positive Findings (If Any):

|             |  |              |  |
|-------------|--|--------------|--|
| Per Abdomen |  |              |  |
| Inspection  |  | Organomegaly |  |
| Palpation   |  |              |  |

#### Other Positive Findings (If Any):

### Genito Urinary System -

### Musculoskeletal System -

### Nervous System

- A. Level of Consciousness Rate: Alert \_\_\_ Lethargic \_\_\_ Stupor \_\_\_\_\_ Coma \_\_\_\_\_  
 B. Handedness

- C. Speech
- D. Posture
- E. Gait
- F. Involuntary movements
- G. Skull and Spine
- H. Extra Pyramidal Side Effects
- I. Meningeal Signs -
- J. MMSE /HMSE Score -

| Nervous System    |                    | Right | Left |
|-------------------|--------------------|-------|------|
| Cranial Nerve     |                    |       |      |
| Motor System      | Bulk               |       |      |
|                   | Power              |       |      |
|                   | Tone               |       |      |
| Reflexes          | Biceps             |       |      |
|                   | Triceps            |       |      |
|                   | Supinator          |       |      |
|                   | Knee               |       |      |
|                   | Ankle              |       |      |
|                   | Corneal            |       |      |
| Sensory System    | Pain               |       |      |
|                   | Touch              |       |      |
|                   | Temperature        |       |      |
|                   | Pressure           |       |      |
|                   | Position           |       |      |
| Cerebellar System | Finger Nose test   |       |      |
|                   | Dysdiadochokinesia |       |      |
|                   | Tandem Walking     |       |      |
|                   | Rombergs           |       |      |
|                   | Stereognosis       |       |      |

**Injury Marks - (Please draw anatomical position diagram of human and mark injury marks):**

**Mental Status Examination / Mini-Mental Status Examination / Kirby Proforma:**

**Cognitive Function:**

**Judgement**

**Insight:**

**Formulation:**

**Provisional Diagnosis:**

**Plan of management:**

- I. Investigation planned
  - a)Haemogram
  - b)Renal Function Test
  - c)Liver Function Test
  - d)Serum Electrolyte
  - e)Thyroid Function Test
  - f)Fasting Blood Sugar
  - g)Fasting Lipid Profile
  - h)HIV/VDRL/ HbS Ag (case to case basis)
  - i)Urine for drug screening (case to case basis)
  - j)Imaging(case to case basis).
  
- II. Psychological Assessment
  - a. Serial Mental Status Examination
  - b. Ward Observation
  - c. Psychological testing
    - Intelligence Quotient testing(case to case basis)
    - Personality assessment (case to case basis)
  - d. Any other please mention.

**Requesting for more information (letters to be dispatched):**

- a. FIR from the police station
- b. Letter to the Court / The Prison
- c. Family members to provide history and to plan for management
- d. Referral to legal aid clinic
- e. Any other letters:

**Signature of the Junior Doctor:**

**Date:**

**Doctor Name:**

**Consultant / Senior Resident's Notes**

**Time.....**

**Signature of the Consultant /Senior Resident:**

**Date:**

**Doctor Name:**
